# Supplementary material
Source: PubMed Central journal article supplement (PMC7039443)
Supplement: NIHMS1545326-supplement-2.pdf [file NIHMS1545326-supplement-2.pdf]

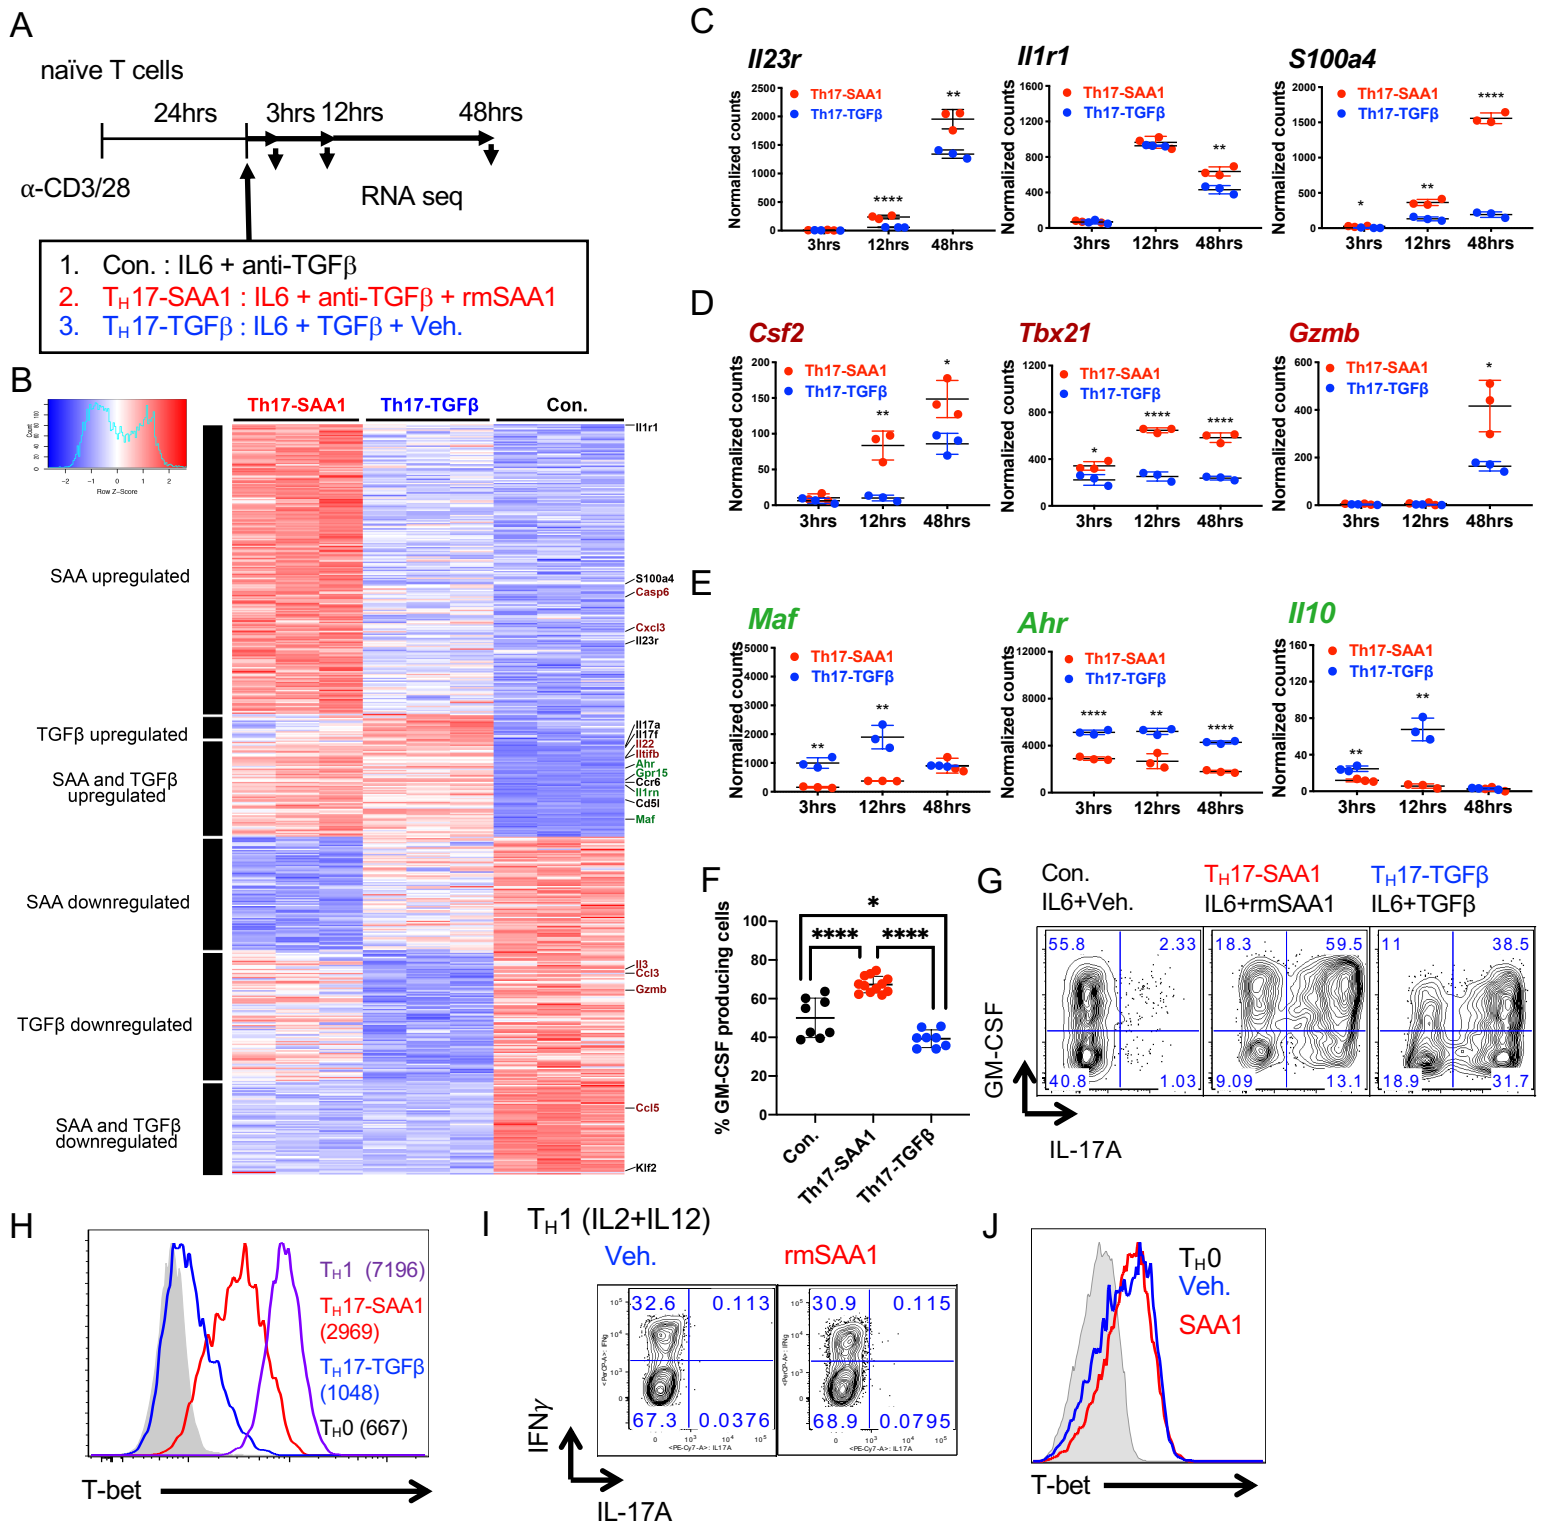

**Figure S2. Transcriptional responses and validation of differentially expressed genes in T<sub>H</sub>17 cells differentiated with IL6 plus SAA1 or TGF- $\beta$ , Related to Figure 2**
