# Supplementary material
Source: PubMed Central journal article supplement (PMC7039443)
Supplement: NIHMS1545326-supplement-3.pdf [file NIHMS1545326-supplement-3.pdf]

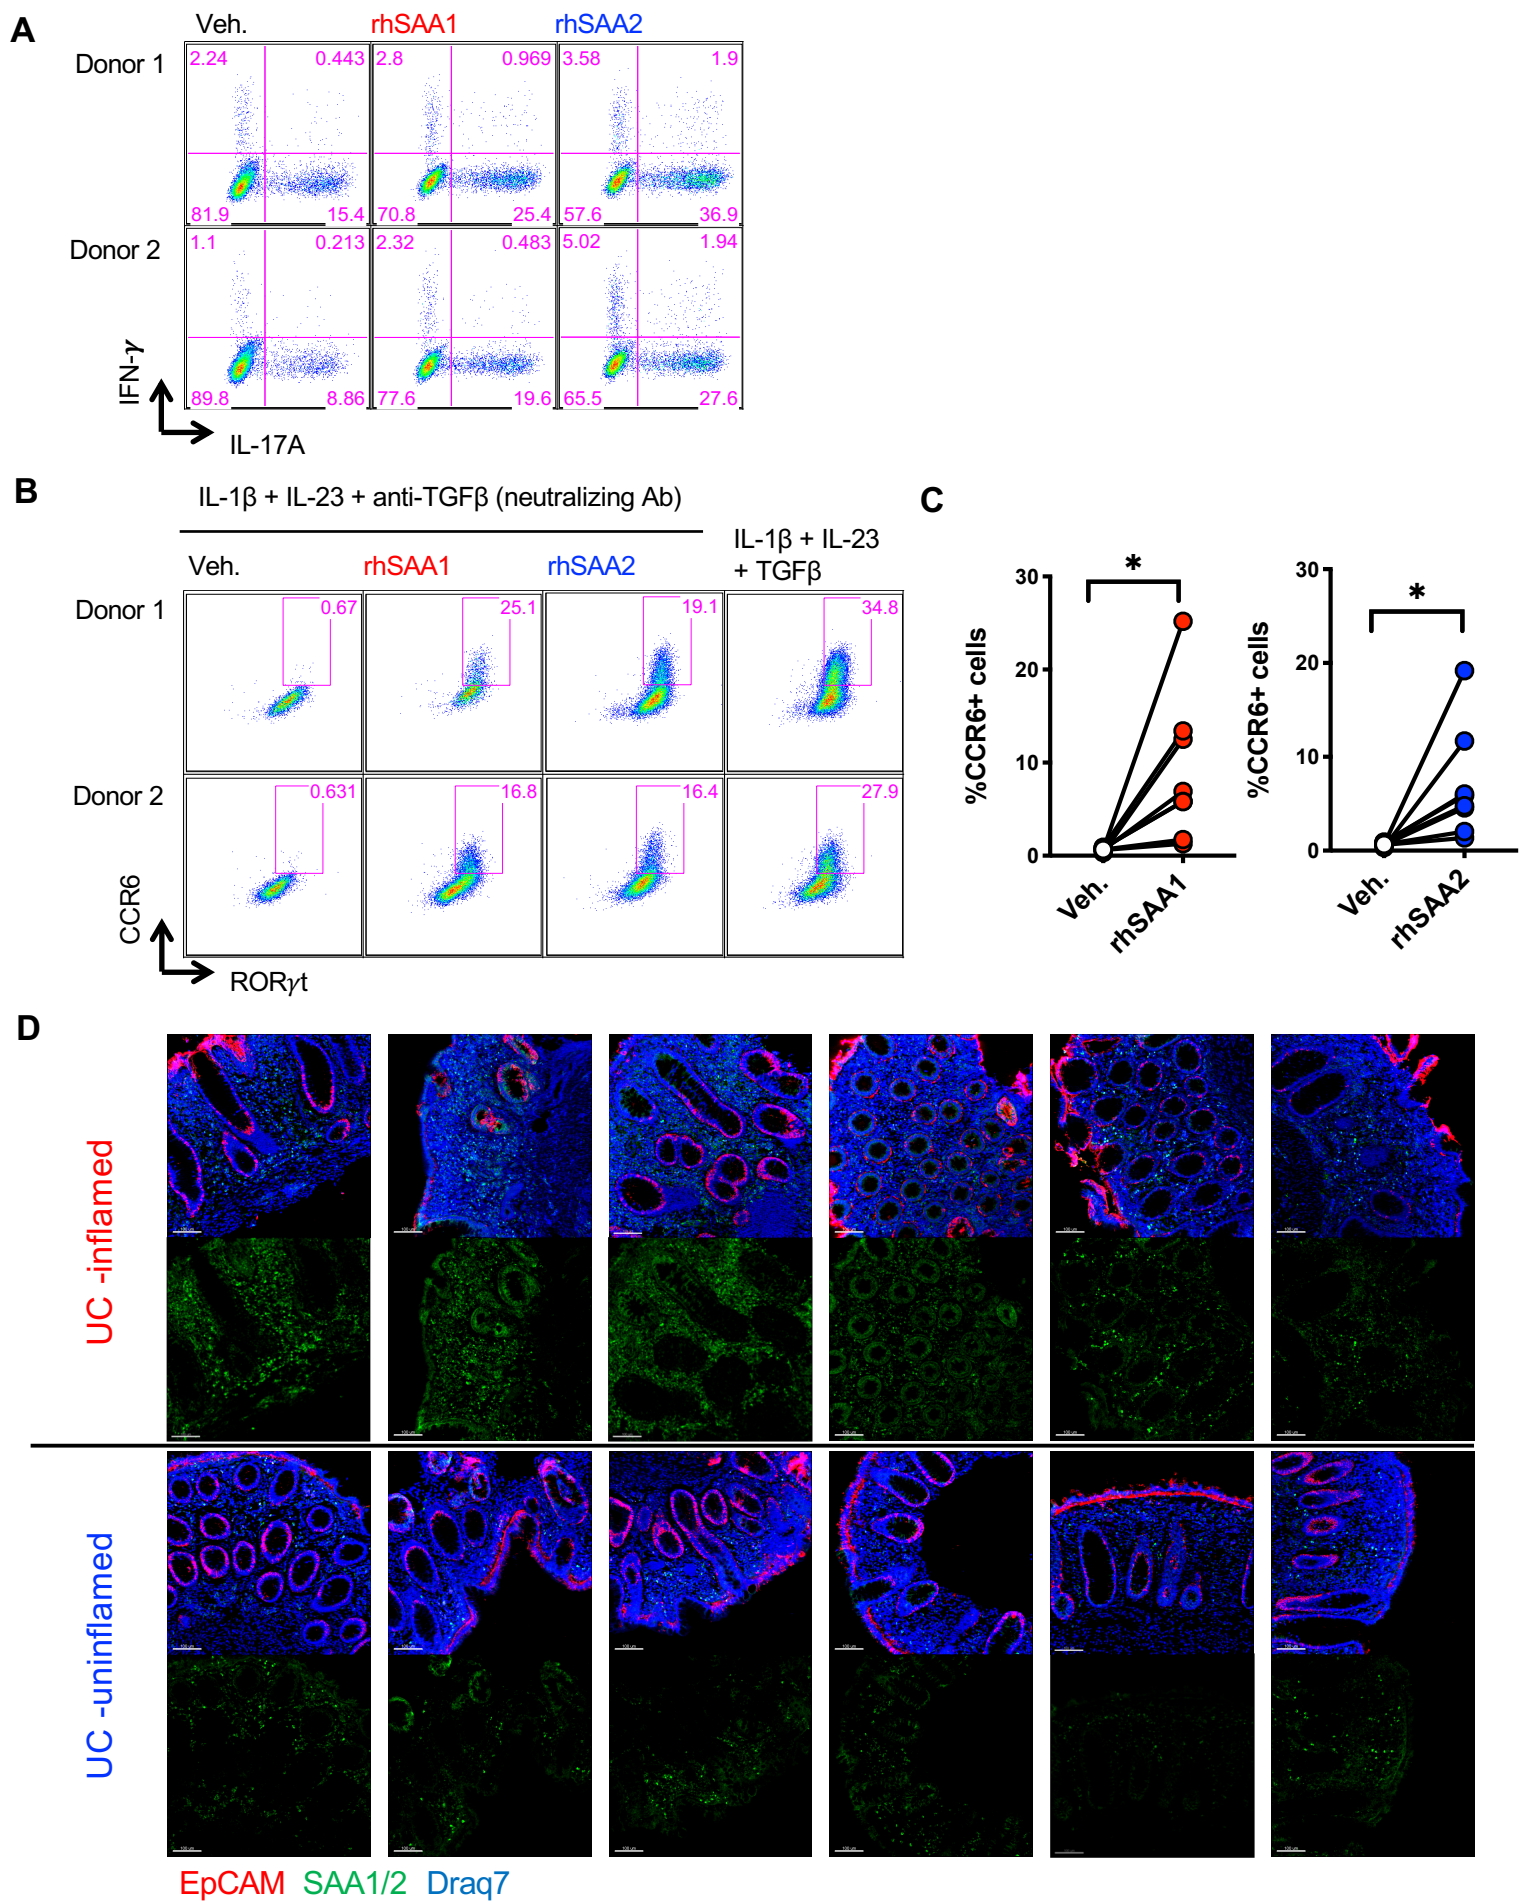

**Figure S3. Role of SAA in human T<sub>H</sub>17 cell differentiation and protein expression in inflamed colon tissue from UC patients, Related to Figure 3**
