# Supplementary material
Source: PubMed Central journal article supplement (PMC7039443)
Supplement: NIHMS1545326-supplement-4.pdf [file NIHMS1545326-supplement-4.pdf]

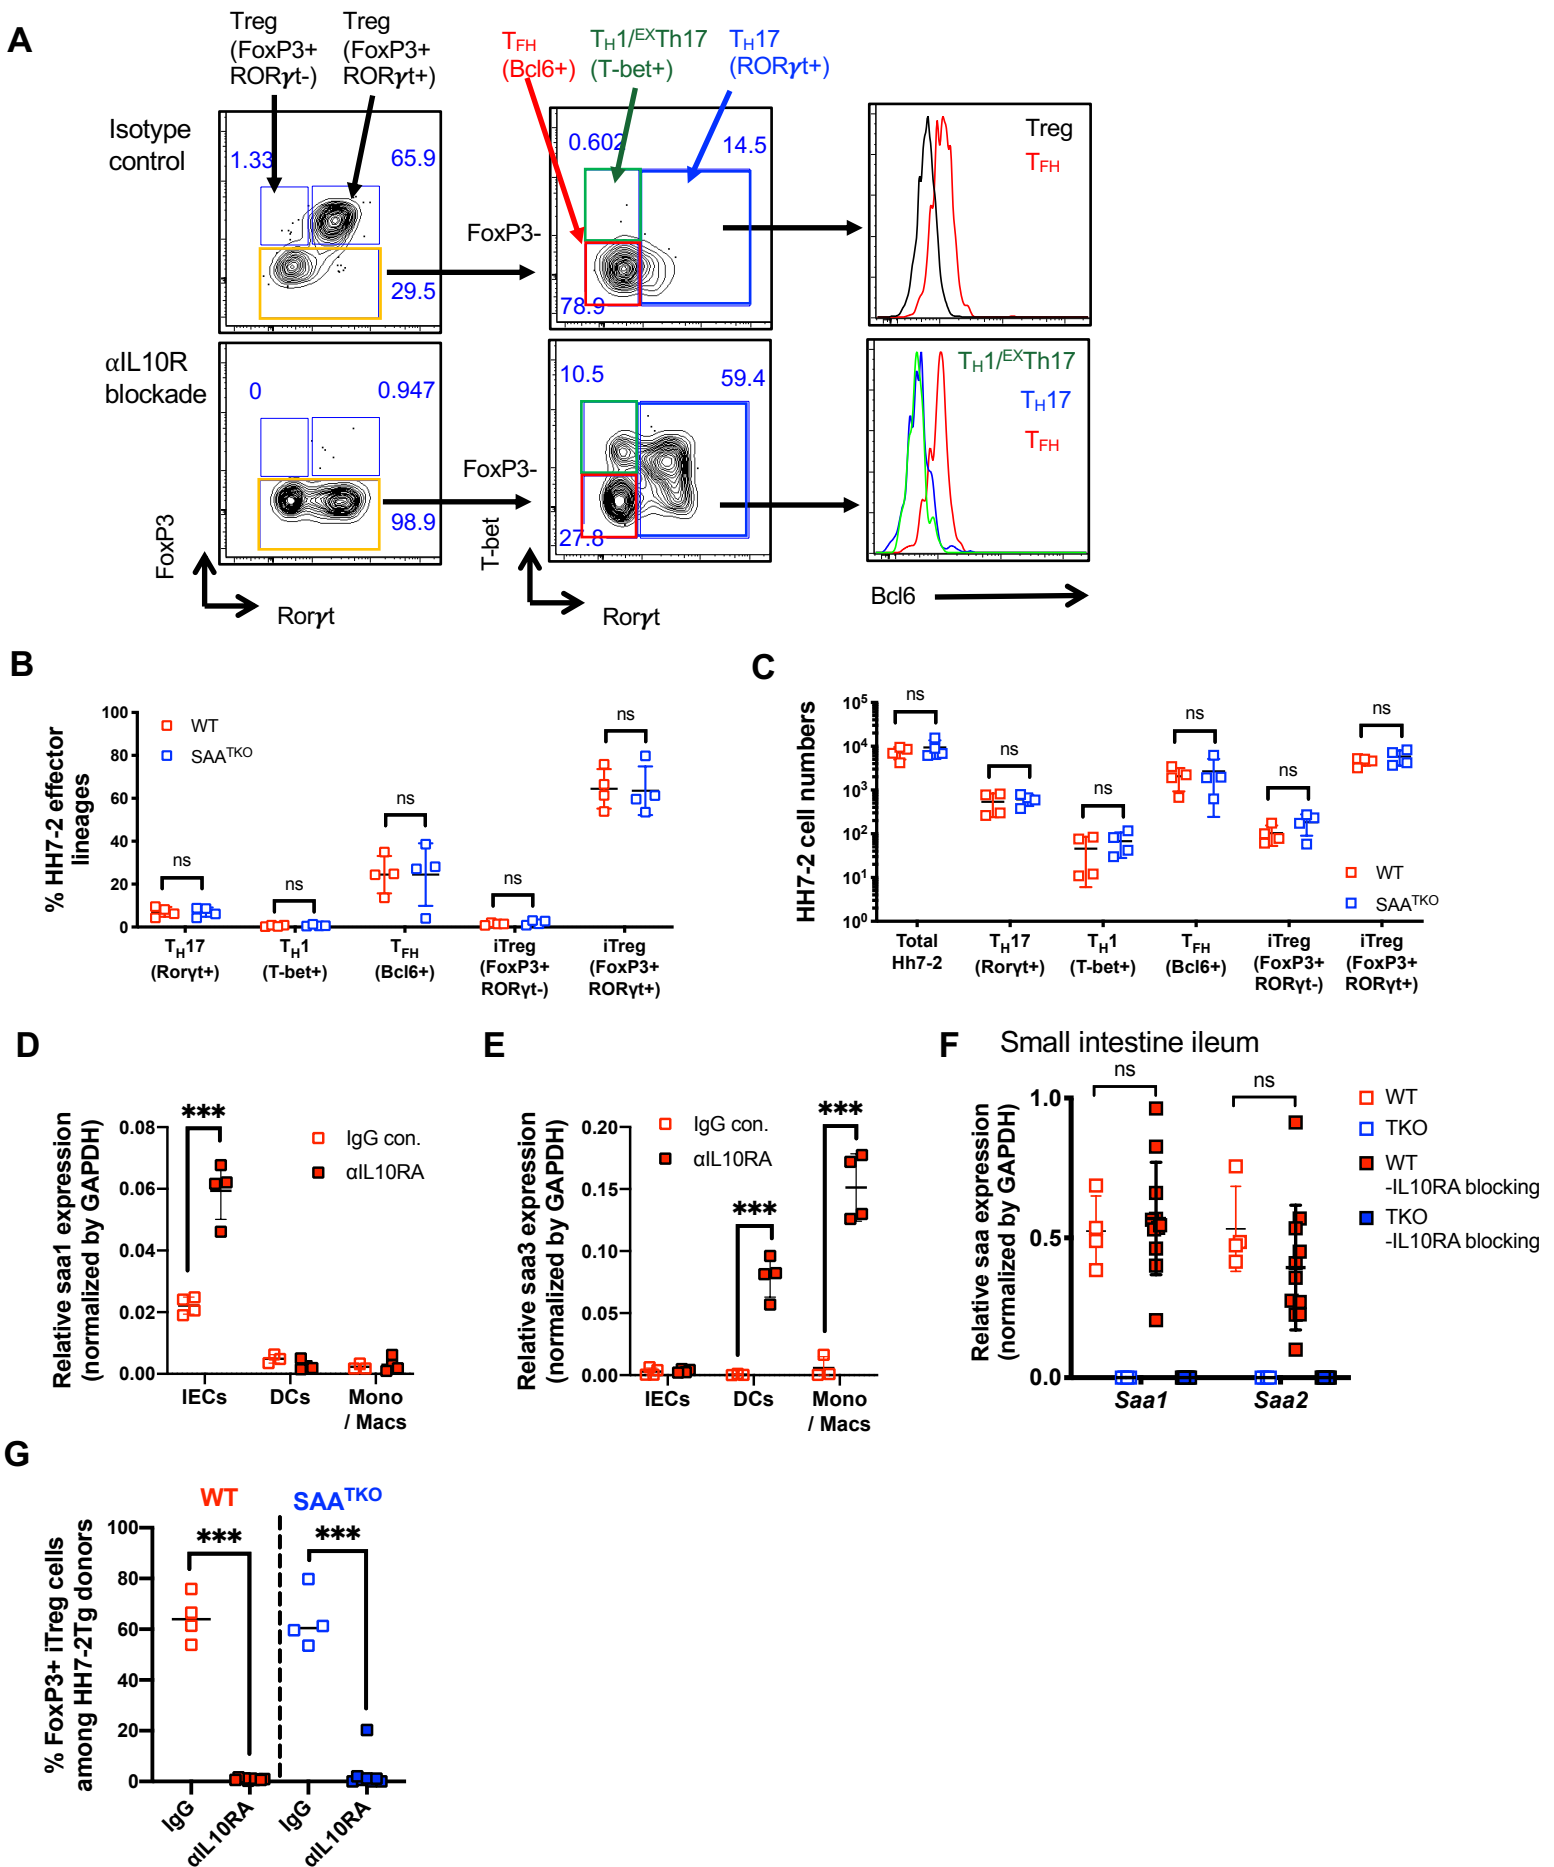

**Figure S4. Role of SAAs in IL-10R blockade-induced colitis in response to *Helicobacter hepaticus*, Related to Figure 4**
