# Supplementary material
Source: PubMed Central journal article supplement (PMC7039443)
Supplement: NIHMS1545326-supplement-7.pdf [file NIHMS1545326-supplement-7.pdf]

## Supplemental Tables

**Table S1 -sgRNA and HDR donor sequence, Related to STAR methods**

| Oligonucleotide         | Sequence                                                                                                                                                                                                      | Note                           |
|-------------------------|---------------------------------------------------------------------------------------------------------------------------------------------------------------------------------------------------------------|--------------------------------|
| Mouse <i>Saa3</i> guide | ttatacgactcactatagGATCTTTGGCTGTCAACTCCC                                                                                                                                                                       | T7 promoter<br>Linker<br>sgRNA |
| HDR donor DNA template  | CCACCCACGAAATGGCATGCTCATCTTTGTTTTCTGGCC<br>CTATAGCAGGATGAAGCCTTCCATTGCCATCATTCTTTGCA<br>TCTTGATCTAGTAAAAGCTTGTTGACAGCCAAAGATGGG<br>TCCAGTTCATGAAAGAAGCTGGTCAAGGTAGGCTTCAAGG<br>ATGGGGGCTGGAGTTGTATTTCTGAGTTTT | Premature<br>stop codons       |

**Table S2 -Antibodies and staining conditions for mouse tissues, Related to STAR methods**

| Antibody               | Species | Conc.  | Clone | Catalog # | Lot #      | Vendor            |
|------------------------|---------|--------|-------|-----------|------------|-------------------|
| SAA1/2                 | Goat    | 1:300  |       | AF2948    | VWJ0417091 | R&D Systems       |
| SAA3                   | Rat     | 1:50   |       | Ab231680  | GR32218061 | Abcam             |
| Draq-7                 |         | 1:1000 |       | 564904    |            | R&D Systems       |
| FC Block               |         | 1:200  | 93    | 101302    | 3255480    | Biolegend         |
| Donkey anti-goat 488   |         | 1:300  |       | A11055    | 1827671    | Life Technologies |
| Donkey anti-rat 594    |         | 1:300  |       | A21209    | 1979379    | Life Technologies |
| Iba-1                  | Rabbit  | 1:500  |       | 019-19741 | LKH4161    | Wako              |
| Donkey anti-rabbit 647 |         | 1:300  |       | A21447    | 1977345    | Life Technologies |
| CD4-BV510              | Rat     | 1:100  | RM4-5 | 100559    | B227810    | Biolegend         |

**Table S3 -Antibodies and staining conditions for human tissues, Related to STAR methods**

| <b>Antibody</b>      | <b>Species</b> | <b>Conc.</b> | <b>Clone</b> | <b>Catalog #</b> | <b>Lot #</b> | <b>Vendor</b>     |
|----------------------|----------------|--------------|--------------|------------------|--------------|-------------------|
| SAA                  | Rabbit         | 1:500        |              | Ab207445         | GR270796-2   | Abcam             |
| SAA                  | Mouse          | 1:50         | mc1          | M0759            | 20059191     | Dako              |
| CD326-BV605          | Mouse          | 1:100        | 9C4          | 324224           | B251369      | Biolegend         |
| Draq-7               |                | 1:1000       |              | 564904           |              | R&D Systems       |
| Goat anti-Rabbit 488 |                | 1:300        |              | A11070           | 1775509      | Life Technologies |
| FC Block             |                | 1:200        |              | 14-9161-73       | 4350496      | Invitrogen        |
