# Supplementary material
Source: PubMed Central journal article supplement (PMC7039443)

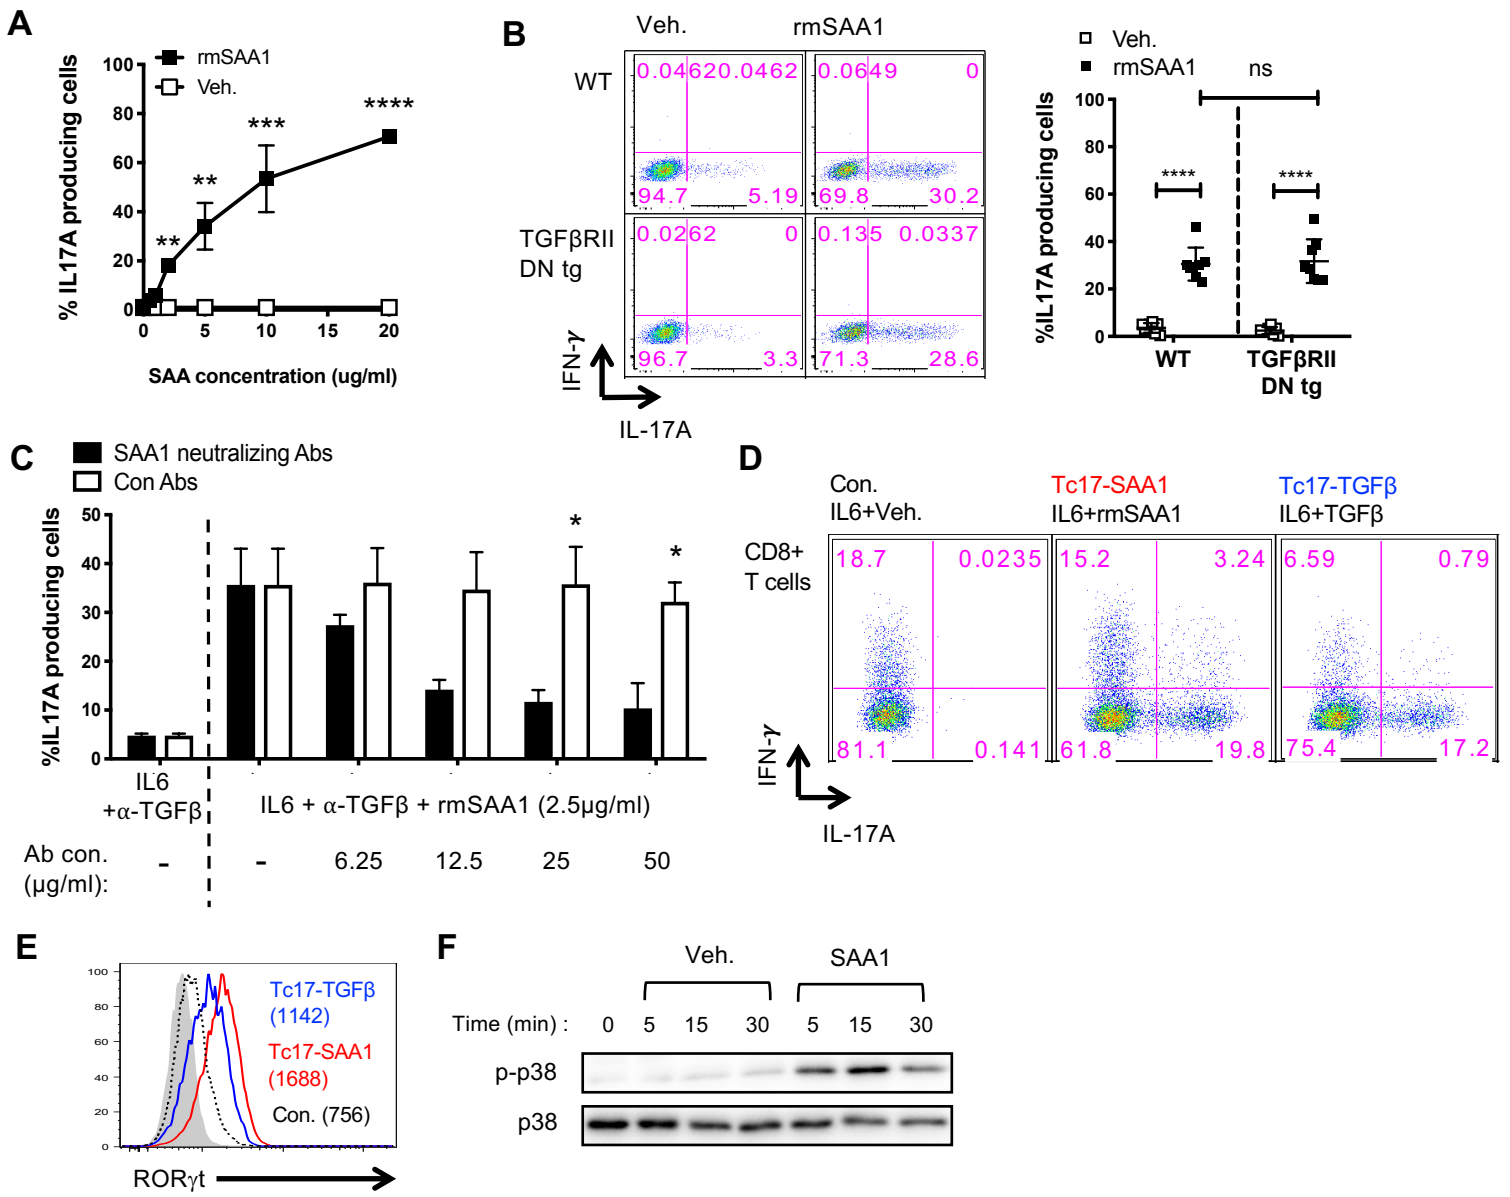

**Figure S1. Mouse T<sub>H</sub>17/Tc17 cell differentiation by SAAs, Related to Figure 1**

Supplement: NIHMS1545326-supplement-1.pdf [file NIHMS1545326-supplement-1.pdf]

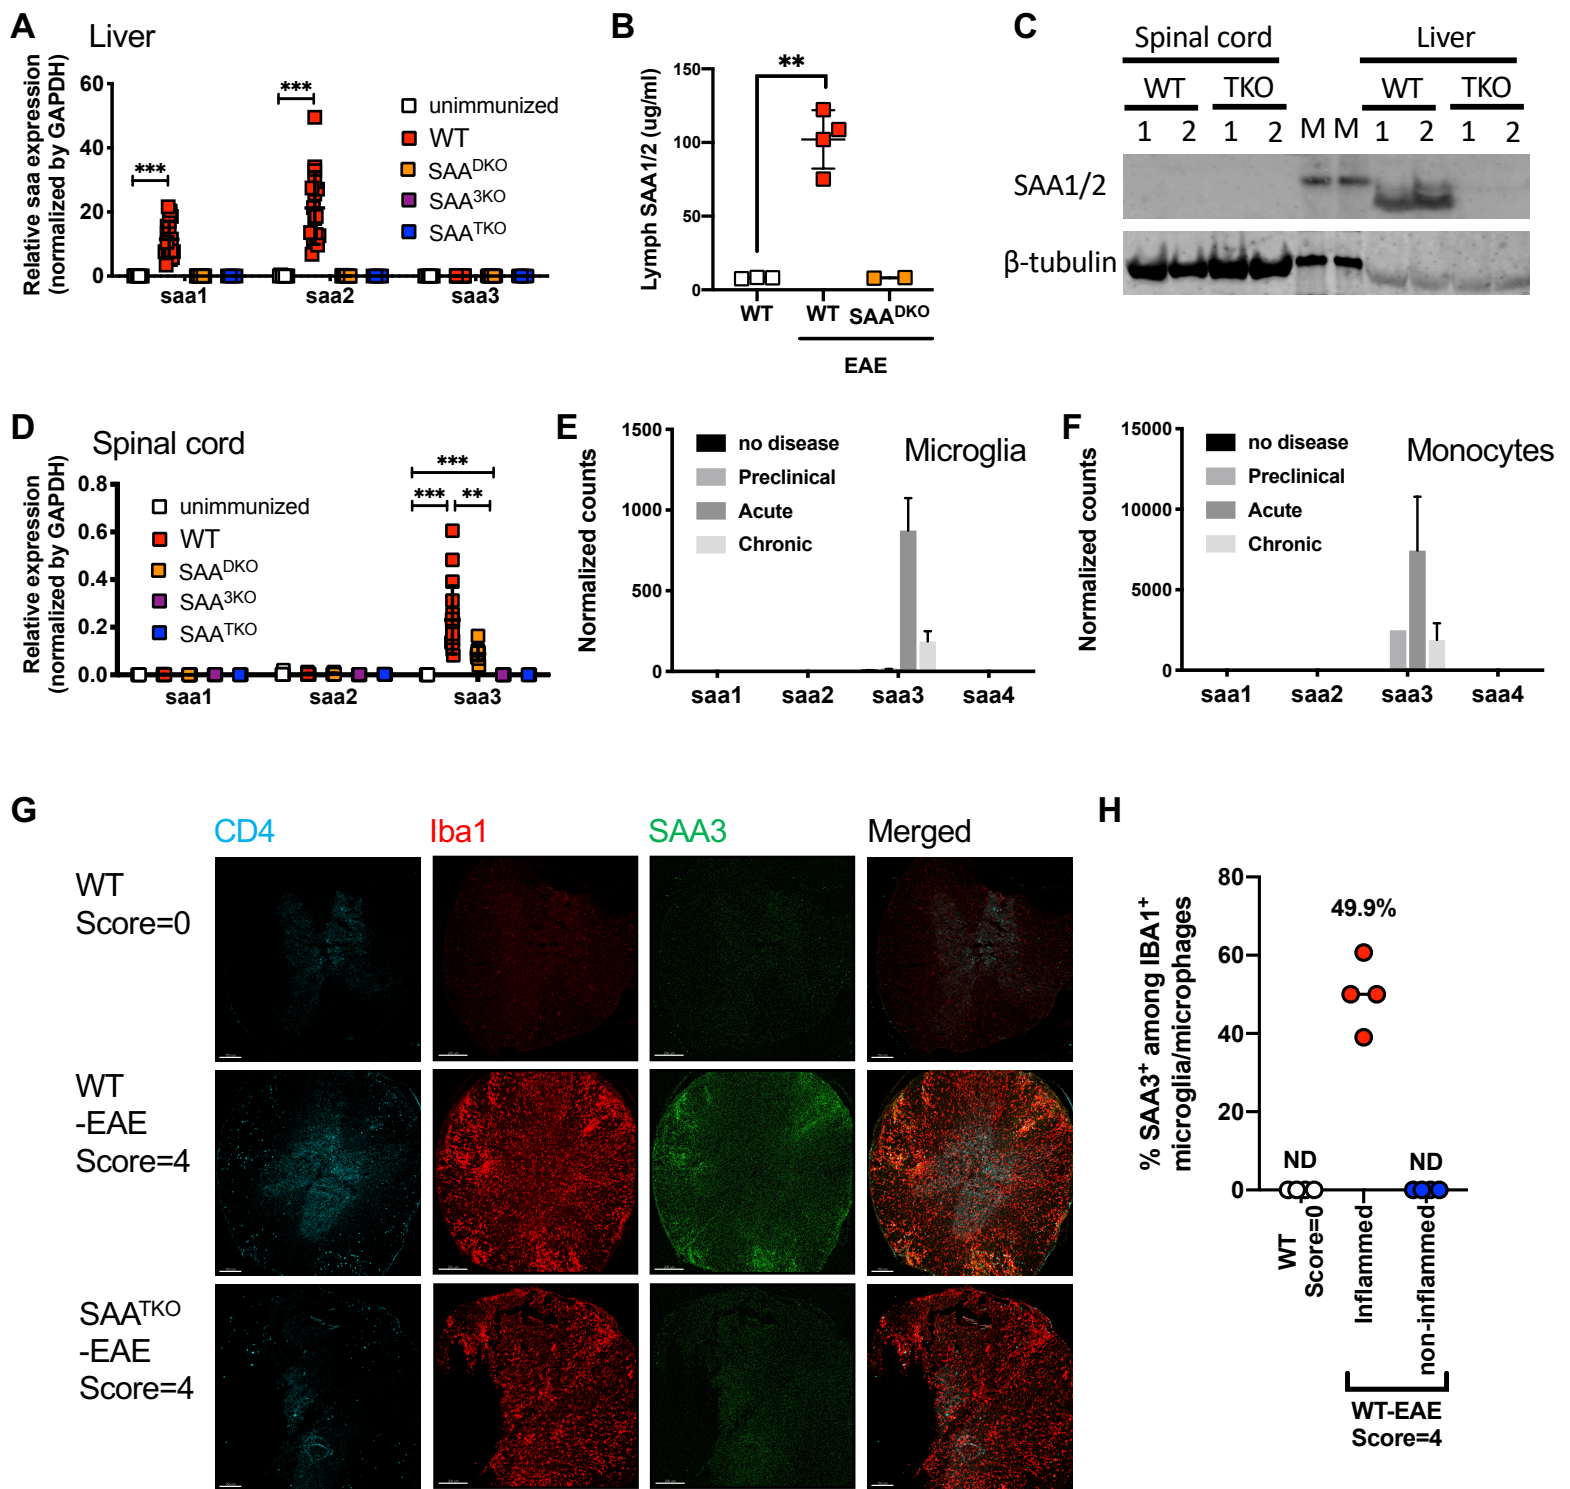

**Figure S5. Distinct sources of SAA production in EAE, Related to Figure 5**

Supplement: NIHMS1545326-supplement-5.pdf [file NIHMS1545326-supplement-5.pdf]

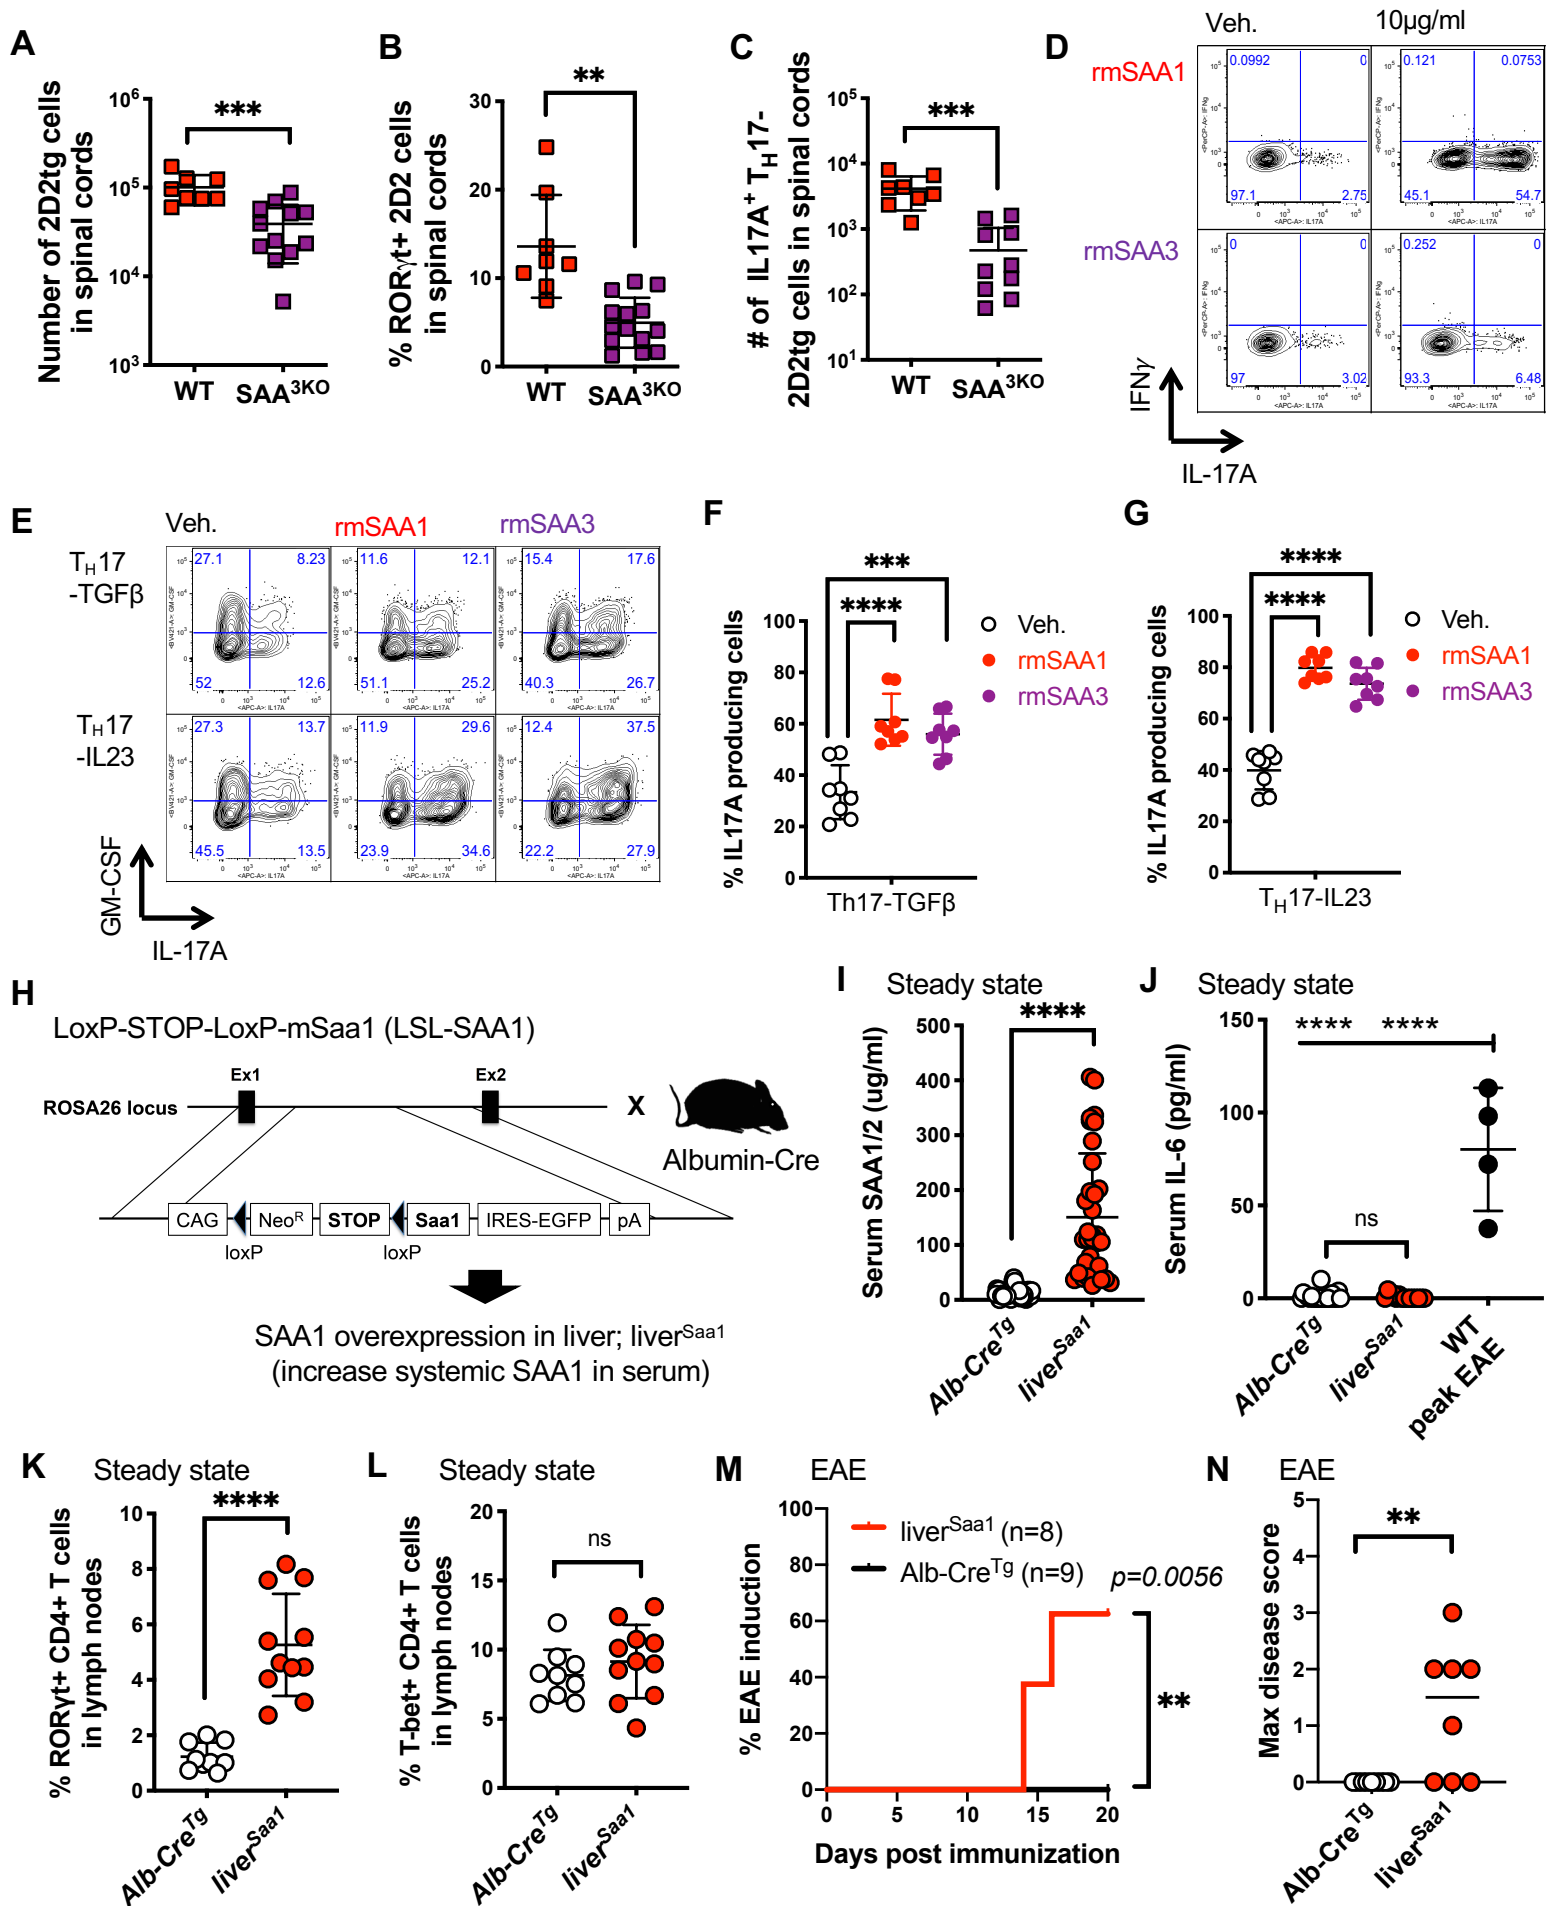

**Figure S6. Role of SAAs in the T<sub>H</sub>17-dependent 2D2 transfer EAE model, Related to Figure 6**

Supplement: NIHMS1545326-supplement-6.pdf [file NIHMS1545326-supplement-6.pdf]
